# Supplementary material
Source: Springer Nature journal article supplement (https://www.springermedizin.de/resource/supplementary/40001_2013_42_MOESM4_ESM.pdf/9685132)

Obese fat Cells

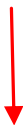

Obese adipocytes

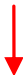

Obesity

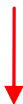

Disfunction of adipose tissue

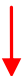

Disturbance of adipocytokines  
levels in circulation

( some increase as leptin and resistin  
and some decrease as adiponectin)

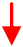

( Crosstalk)

macrophage infiltration in adipose tissue  
(recruitment of macrophage)

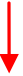

Release of cytokines –stimulation of  
pro-inflammatory processes

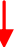

Insulin resistance

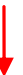

Diabetes type 2

Pathogenic State of gain weight

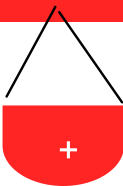

Supplement: MOESM4 [file 9685132]
